# Supplementary material
Source: PubMed Central journal article supplement (PMC2533217)
Supplement: 0800999105_0800999105SI.pdf [file 0800999105_0800999105SI.pdf]

# Supporting Information

Teplitsky *et al.* 10.1073/pnas.0800999105

Table S1. Standardized selection differentials from the yearly selection analysis using survival as a fitness estimate

| Year | Females |               |              |               |              | Males |               |              |               |              |
|------|---------|---------------|--------------|---------------|--------------|-------|---------------|--------------|---------------|--------------|
|      | df      | Estimate      | SE           | t             | P            | df    | Estimate      | SE           | t             | P            |
| 1969 | 74      | 0.062         | 0.082        | 0.756         | 0.452        | 121   | -0.005        | 0.052        | -0.099        | 0.922        |
| 1970 | 68      | 0.002         | 0.035        | 0.063         | 0.950        | 111   | 0.024         | 0.044        | 0.558         | 0.578        |
| 1971 | 72      | 0.018         | 0.034        | 0.539         | 0.592        | 108   | 0.035         | 0.057        | 0.620         | 0.537        |
| 1972 | 71      | 0.020         | 0.050        | 0.399         | 0.691        | 98    | 0.051         | 0.057        | 0.893         | 0.374        |
| 1973 | 71      | -0.006        | 0.035        | -0.169        | 0.867        | 90    | -0.035        | 0.045        | -0.785        | 0.435        |
| 1974 | 73      | 0.120         | 0.067        | 1.792         | 0.077        | 93    | -0.073        | 0.054        | -1.365        | 0.176        |
| 1975 | 115     | -0.035        | 0.035        | -0.986        | 0.326        | 137   | 0.009         | 0.031        | 0.301         | 0.764        |
| 1976 | 170     | -0.008        | 0.036        | -0.213        | 0.831        | 186   | 0.020         | 0.034        | 0.583         | 0.561        |
| 1977 | 171     | -0.054        | 0.046        | -1.176        | 0.241        | 182   | -0.027        | 0.045        | -0.599        | 0.550        |
| 1978 | 161     | 0.004         | 0.058        | 0.076         | 0.939        | 161   | 0.010         | 0.043        | 0.223         | 0.824        |
| 1979 | 147     | 0.042         | 0.049        | 0.856         | 0.393        | 147   | 0.096         | 0.052        | 1.849         | 0.067        |
| 1980 | 139     | <b>-0.112</b> | <b>0.059</b> | <b>-1.904</b> | <b>0.059</b> | 129   | -0.064        | 0.063        | -1.016        | 0.311        |
| 1981 | 167     | -0.019        | 0.061        | -0.316        | 0.752        | 157   | <b>-0.133</b> | <b>0.049</b> | <b>-2.697</b> | <b>0.008</b> |
| 1982 | 150     | -0.068        | 0.057        | -1.187        | 0.237        | 140   | -0.037        | 0.053        | -0.693        | 0.490        |
| 1983 | 148     | <b>0.103</b>  | <b>0.053</b> | <b>1.961</b>  | <b>0.052</b> | 125   | 0.040         | 0.052        | 0.766         | 0.445        |
| 1984 | 137     | 0.082         | 0.064        | 1.287         | 0.200        | 113   | -0.108        | 0.063        | -1.712        | 0.090        |
| 1985 | 125     | <b>-0.162</b> | <b>0.084</b> | <b>-1.929</b> | <b>0.056</b> | 97    | -0.011        | 0.066        | -0.169        | 0.867        |
| 1986 | 271     | -0.016        | 0.042        | -0.371        | 0.711        | 240   | 0.021         | 0.030        | 0.698         | 0.486        |
| 1987 | 318     | 0.026         | 0.044        | 0.589         | 0.557        | 284   | 0.005         | 0.033        | 0.138         | 0.890        |
| 1988 | 415     | -0.012        | 0.032        | -0.359        | 0.720        | 362   | -0.012        | 0.028        | -0.427        | 0.670        |
| 1989 | 405     | 0.012         | 0.035        | 0.341         | 0.733        | 353   | <b>-0.087</b> | <b>0.034</b> | <b>-2.549</b> | <b>0.011</b> |
| 1990 | 436     | 0.015         | 0.035        | 0.444         | 0.657        | 373   | 0.038         | 0.035        | 1.081         | 0.281        |
| 1991 | 425     | -0.002        | 0.030        | -0.070        | 0.944        | 346   | -0.052        | 0.033        | -1.572        | 0.117        |
| 1992 | 428     | -0.012        | 0.043        | -0.285        | 0.776        | 343   | -0.022        | 0.045        | -0.483        | 0.629        |
| 1993 | 390     | -0.048        | 0.038        | -1.264        | 0.207        | 303   | <b>0.090</b>  | <b>0.047</b> | <b>1.908</b>  | <b>0.057</b> |
| 1994 | 374     | -0.034        | 0.053        | -0.631        | 0.528        | 263   | -0.012        | 0.049        | -0.249        | 0.803        |
| 1995 | 345     | -0.011        | 0.052        | -0.202        | 0.840        | 246   | 0.024         | 0.045        | 0.525         | 0.600        |
| 1996 | 333     | -0.031        | 0.052        | -0.592        | 0.554        | 236   | -0.031        | 0.053        | -0.592        | 0.554        |
| 1997 | 335     | 0.015         | 0.045        | 0.336         | 0.737        | 226   | 0.040         | 0.042        | 0.951         | 0.343        |
| 1998 | 334     | 0.058         | 0.053        | 1.095         | 0.274        | 221   | 0.037         | 0.050        | 0.734         | 0.464        |
| 1999 | 305     | 0.014         | 0.047        | 0.294         | 0.769        | 197   | 0.000         | 0.050        | -0.010        | 0.992        |
| 2000 | 288     | <b>0.161</b>  | <b>0.063</b> | <b>2.567</b>  | <b>0.011</b> | 191   | -0.050        | 0.059        | -0.851        | 0.396        |
| 2001 | 256     | -0.037        | 0.069        | -0.540        | 0.590        | 175   | -0.072        | 0.074        | -0.968        | 0.334        |
| 2002 | 220     | -0.025        | 0.066        | -0.379        | 0.705        | 164   | -0.127        | 0.077        | -1.645        | 0.102        |
| 2003 | 197     | 0.008         | 0.052        | 0.154         | 0.878        | 139   | -0.005        | 0.073        | -0.063        | 0.950        |

Significant standardized selection differentials are in bold.

**Table S2. Significance of the random effects in the animal model**

| Fitted effect | Restricted dataset |            |    |          |          | Whole dataset |          |      |          |          |
|---------------|--------------------|------------|----|----------|----------|---------------|----------|------|----------|----------|
|               | Full model         | – Maternal | dL | $\chi^2$ | <i>P</i> | Full model    | –PE      | dL   | $\chi^2$ | <i>P</i> |
| Females       | –5169.16           | –5169.16   | 0  | 0        | 1        | –7147.65      | –7148.24 | 0.59 | 1.18     | 0.28     |
| Males         | –4883.49           | –4883.49   | 0  | 0        | 1        | –6948.83      | –6949.15 | 0.32 | 0.64     | 0.42     |

We started from a complete model dropping random effects sequentially. Resulting models were compared with likelihood ratio tests (LRT) where twice the difference in the log-likelihood of models (dL) was compared to a  $\chi^2$  distribution with degrees of freedom equaling the difference in the number of parameters between the models [Pinheiro JC, Bates DM (2000) *Mixed-Effects Models in S and S-Plus*. (Springer, New York)]. Maternal effects were modeled using the mother identity as a random effect. Permanent environment effects were estimated by including individual identity (unlinked to pedigree) into model as an additional random effect. Because estimation of maternal effects reduced the sample size, we first estimated maternal effects, and if not significant, subsequent models used all data aiming at estimating the size of variance components due to additive genetic and permanent environment effects. Permanent environment effects were retained in the models even if they were not significant to account for the repeated observations per individual and, hence, nonindependence of the data.
